# Supplementary material
Source: publisher site journal article supplement (https://www.dovepress.com/article/380840)
Supplement: Supplementary file 1 [file get_supplementary_file.php]

1 ORIGINAL RESEARCH

2 Jensen *et al*

3 **Routine clinical care creatinine data in Denmark – An**  
4 **epidemiological resource for nationwide population-**  
5 **based studies of kidney disease**

6

7

8

## 9 Supplementary material

### 10 **Tables**

11 **Table S1. Time points when complete reporting was achieved by region and**  
 12 **municipality using the combined creatinine data from the Clinical Laboratory**  
 13 **Information System Research Database (LABKA) and the Register of Laboratory**  
 14 **Results for Research (RLRR)**

| Region                     | Municipality   | The month in which<br>≥8% of individuals with<br>diabetes are tested | The month in which<br>coverage is considered<br>complete |
|----------------------------|----------------|----------------------------------------------------------------------|----------------------------------------------------------|
| Capital Region of Denmark  | Overall        | 09-2014                                                              | 10-2014                                                  |
| Capital Region of Denmark  | Albertslund    | 02-2010                                                              | 10-2014                                                  |
| Capital Region of Denmark  | Allerød        | 09-2014                                                              | 10-2014                                                  |
| Capital Region of Denmark  | Ballerup       | 02-2010                                                              | 10-2014                                                  |
| Capital Region of Denmark  | Bornholm       | 09-2014                                                              | 10-2014                                                  |
| Capital Region of Denmark  | Brøndby        | 02-2010                                                              | 10-2014                                                  |
| Capital Region of Denmark  | Dragør         | 02-2010                                                              | 10-2014                                                  |
| Capital Region of Denmark  | Egedal         | 09-2014                                                              | 10-2014                                                  |
| Capital Region of Denmark  | Fredensborg    | 09-2014                                                              | 10-2014                                                  |
| Capital Region of Denmark  | Frederiksberg  | 09-2014                                                              | 10-2014                                                  |
| Capital Region of Denmark  | Frederikssund  | 09-2014                                                              | 10-2014                                                  |
| Capital Region of Denmark  | Furesø         | 10-2013                                                              | 10-2014                                                  |
| Capital Region of Denmark  | Gentofte       | 11-2010                                                              | 10-2014                                                  |
| Capital Region of Denmark  | Gladsaxe       | 02-2010                                                              | 10-2014                                                  |
| Capital Region of Denmark  | Glostrup       | 02-2010                                                              | 10-2014                                                  |
| Capital Region of Denmark  | Gribskov       | 09-2014                                                              | 10-2014                                                  |
| Capital Region of Denmark  | Halsnæs        | 09-2014                                                              | 10-2014                                                  |
| Capital Region of Denmark  | Helsingør      | 09-2014                                                              | 10-2014                                                  |
| Capital Region of Denmark  | Herlev         | 02-2010                                                              | 10-2014                                                  |
| Capital Region of Denmark  | Hillerød       | 09-2014                                                              | 10-2014                                                  |
| Capital Region of Denmark  | Hvidovre       | 01-2010                                                              | 10-2014                                                  |
| Capital Region of Denmark  | Høje-Taastrup  | 02-2010                                                              | 10-2014                                                  |
| Capital Region of Denmark  | Hørsholm       | 09-2014                                                              | 10-2014                                                  |
| Capital Region of Denmark  | Ishøj          | 02-2010                                                              | 10-2014                                                  |
| Capital Region of Denmark  | København      | 01-2010                                                              | 10-2014                                                  |
| Capital Region of Denmark  | Lyngby-Tårnbæk | 02-2010                                                              | 10-2014                                                  |
| Capital Region of Denmark  | Rudersdal      | 10-2013                                                              | 10-2014                                                  |
| Capital Region of Denmark  | Rødovre        | 02-2010                                                              | 10-2014                                                  |
| Capital Region of Denmark  | Tårnby         | 01-2010                                                              | 10-2014                                                  |
| Capital Region of Denmark  | Vallensbæk     | 02-2010                                                              | 10-2014                                                  |
| Region of Southern Denmark | Overall        | 09-2015                                                              | 10-2015                                                  |
| Region of Southern Denmark | Assens         | 09-2015                                                              | 10-2015                                                  |

|                            |                 |         |         |
|----------------------------|-----------------|---------|---------|
| Region of Southern Denmark | Billund         | 09-2015 | 10-2015 |
| Region of Southern Denmark | Esbjerg         | 09-2015 | 10-2015 |
| Region of Southern Denmark | Fanø            | 09-2015 | 10-2015 |
| Region of Southern Denmark | Fredericia      | 09-2015 | 10-2015 |
| Region of Southern Denmark | Faaborg-Midtfyn | 09-2015 | 10-2015 |
| Region of Southern Denmark | Haderslev       | 09-2015 | 10-2015 |
| Region of Southern Denmark | Kerteminde      | 09-2015 | 10-2015 |
| Region of Southern Denmark | Kolding         | 09-2015 | 10-2015 |
| Region of Southern Denmark | Langeland       | 09-2015 | 09-2015 |
| Region of Southern Denmark | Middelfart      | 09-2015 | 10-2015 |
| Region of Southern Denmark | Nordfyns        | 09-2015 | 10-2015 |
| Region of Southern Denmark | Nyborg          | 09-2015 | 09-2015 |
| Region of Southern Denmark | Odense          | 09-2015 | 10-2015 |
| Region of Southern Denmark | Svendborg       | 09-2015 | 09-2015 |
| Region of Southern Denmark | Sønderborg      | 09-2015 | 10-2015 |
| Region of Southern Denmark | Tønder          | 09-2015 | 10-2015 |
| Region of Southern Denmark | Varde           | 09-2015 | 10-2015 |
| Region of Southern Denmark | Vejen           | 09-2015 | 10-2015 |
| Region of Southern Denmark | Vejle           | 09-2015 | 10-2015 |
| Region of Southern Denmark | Ærø             | 09-2015 | 09-2015 |
| Region of Southern Denmark | Aabenraa        | 09-2015 | 10-2015 |
| Region Zealand             | Overall         | 02-2014 | 02-2014 |
| Region Zealand             | Faxe            | 02-2014 | 02-2014 |
| Region Zealand             | Greve           | 02-2014 | 02-2014 |
| Region Zealand             | Guldborgsund    | 02-2014 | 02-2014 |
| Region Zealand             | Holbæk          | 02-2014 | 02-2014 |
| Region Zealand             | Kalundborg      | 02-2014 | 02-2014 |
| Region Zealand             | Køge            | 02-2014 | 02-2014 |
| Region Zealand             | Lejre           | 02-2014 | 02-2014 |
| Region Zealand             | Lolland         | 02-2014 | 02-2014 |
| Region Zealand             | Næstved         | 02-2014 | 02-2014 |
| Region Zealand             | Odsherred       | 02-2014 | 02-2014 |
| Region Zealand             | Ringsted        | 02-2014 | 02-2014 |
| Region Zealand             | Roskilde        | 02-2014 | 02-2014 |
| Region Zealand             | Slagelse        | 02-2014 | 02-2014 |
| Region Zealand             | Solrød          | 02-2014 | 02-2014 |
| Region Zealand             | Sorø            | 02-2014 | 02-2014 |
| Region Zealand             | Stevns          | 02-2014 | 02-2014 |
| Region Zealand             | Vordingborg     | 02-2014 | 02-2014 |
| Central Denmark Region     | Overall         | 11-2009 | 11-2009 |
| Central Denmark Region     | Favrskov        | 03-2000 | 07-2000 |
| Central Denmark Region     | Hedensted       | 01-2009 | 01-2009 |
| Central Denmark Region     | Herning         | 03-2006 | 07-2006 |
| Central Denmark Region     | Holstebro       | 03-2006 | 07-2006 |
| Central Denmark Region     | Horsens         | 11-2009 | 11-2009 |
| Central Denmark Region     | Ikast-Brande    | 03-2006 | 07-2006 |

|                        |                              |         |         |
|------------------------|------------------------------|---------|---------|
| Central Denmark Region | Lemvig                       | 04-2006 | 07-2006 |
| Central Denmark Region | Norddjurs                    | 04-2000 | 05-2000 |
| Central Denmark Region | Odder                        | 11-2009 | 11-2009 |
| Central Denmark Region | Randers                      | 04-2000 | 05-2000 |
| Central Denmark Region | Ringkøbing-Skjern            | 04-2006 | 04-2006 |
| Central Denmark Region | Samsø                        | 11-2003 | 08-1995 |
| Central Denmark Region | Silkeborg                    | 05-1995 | 08-1995 |
| Central Denmark Region | Skanderborg                  | 08-1995 | 08-1995 |
| Central Denmark Region | Skive                        | 10-2004 | 11-2004 |
| Central Denmark Region | Struer                       | 03-2006 | 06-2006 |
| Central Denmark Region | Syddjurs                     | 04-2000 | 05-2000 |
| Central Denmark Region | Viborg                       | 10-2004 | 11-2004 |
| Central Denmark Region | Århus                        | 06-1995 | 08-1995 |
| North Denmark Region   | Overall                      | 10-2004 | 11-2004 |
| North Denmark Region   | Aalborg                      | 04-1997 | 08-1997 |
| North Denmark Region   | Brønderslev-<br>Dronninglund | 11-1996 | 01-1997 |
| North Denmark Region   | Frederikshavn                | 10-1996 | 07-1997 |
| North Denmark Region   | Hjørring                     | 11-1996 | 01-1997 |
| North Denmark Region   | Jammerbugt                   | 01-1997 | 07-1997 |
| North Denmark Region   | Læsø                         | 01-1999 | 07-1997 |
| North Denmark Region   | Mariagerfjord                | 08-1997 | 08-1997 |
| North Denmark Region   | Morsø                        | 10-2004 | 11-2004 |
| North Denmark Region   | Rebild                       | 04-1997 | 07-1997 |
| North Denmark Region   | Thisted                      | 10-2004 | 11-2004 |
| North Denmark Region   | Vesthimmerlands              | 04-1997 | 10-1997 |

16 **Table S2. Time points when complete reporting was achieved by region and**  
17 **municipality using creatinine data from the Register of Laboratory Results for**  
18 **Research (RLRR)**

| <b>Region</b>              | <b>Municipality</b> | <b>The month in which<br/>≥8% of individuals with<br/>diabetes are tested</b> | <b>The month in which<br/>coverage is considered<br/>complete</b> |
|----------------------------|---------------------|-------------------------------------------------------------------------------|-------------------------------------------------------------------|
| Capital Region of Denmark  | Overall             | 09-2014                                                                       | 10-2014                                                           |
| Capital Region of Denmark  | Albertslund         | 02-2010                                                                       | 10-2014                                                           |
| Capital Region of Denmark  | Allerød             | 09-2014                                                                       | 10-2014                                                           |
| Capital Region of Denmark  | Ballerup            | 02-2010                                                                       | 10-2014                                                           |
| Capital Region of Denmark  | Bornholm            | 09-2014                                                                       | 10-2014                                                           |
| Capital Region of Denmark  | Brøndby             | 02-2010                                                                       | 10-2014                                                           |
| Capital Region of Denmark  | Dragør              | 02-2010                                                                       | 10-2014                                                           |
| Capital Region of Denmark  | Egedal              | 09-2014                                                                       | 10-2014                                                           |
| Capital Region of Denmark  | Fredensborg         | 09-2014                                                                       | 10-2014                                                           |
| Capital Region of Denmark  | Frederiksberg       | 09-2014                                                                       | 10-2014                                                           |
| Capital Region of Denmark  | Frederikssund       | 09-2014                                                                       | 10-2014                                                           |
| Capital Region of Denmark  | Furesø              | 10-2013                                                                       | 10-2014                                                           |
| Capital Region of Denmark  | Gentofte            | 11-2010                                                                       | 10-2014                                                           |
| Capital Region of Denmark  | Gladsaxe            | 02-2010                                                                       | 10-2014                                                           |
| Capital Region of Denmark  | Glostrup            | 02-2010                                                                       | 10-2014                                                           |
| Capital Region of Denmark  | Gribskov            | 09-2014                                                                       | 10-2014                                                           |
| Capital Region of Denmark  | Halsnæs             | 09-2014                                                                       | 10-2014                                                           |
| Capital Region of Denmark  | Helsingør           | 09-2014                                                                       | 10-2014                                                           |
| Capital Region of Denmark  | Herlev              | 02-2010                                                                       | 10-2014                                                           |
| Capital Region of Denmark  | Hillerød            | 09-2014                                                                       | 10-2014                                                           |
| Capital Region of Denmark  | Hvidovre            | 01-2010                                                                       | 10-2014                                                           |
| Capital Region of Denmark  | Høje-Taastrup       | 02-2010                                                                       | 10-2014                                                           |
| Capital Region of Denmark  | Hørsholm            | 09-2014                                                                       | 10-2014                                                           |
| Capital Region of Denmark  | Ishøj               | 02-2010                                                                       | 10-2014                                                           |
| Capital Region of Denmark  | København           | 01-2010                                                                       | 10-2014                                                           |
| Capital Region of Denmark  | Lyngby-Tårnbæk      | 02-2010                                                                       | 10-2014                                                           |
| Capital Region of Denmark  | Rudersdal           | 10-2013                                                                       | 10-2014                                                           |
| Capital Region of Denmark  | Rødovre             | 02-2010                                                                       | 10-2014                                                           |
| Capital Region of Denmark  | Tårnby              | 01-2010                                                                       | 10-2014                                                           |
| Capital Region of Denmark  | Vallensbæk          | 02-2010                                                                       | 10-2014                                                           |
| Region of Southern Denmark | Overall             | 09-2015                                                                       | 10-2015                                                           |
| Region of Southern Denmark | Assens              | 09-2015                                                                       | 10-2015                                                           |
| Region of Southern Denmark | Billund             | 09-2015                                                                       | 10-2015                                                           |
| Region of Southern Denmark | Esbjerg             | 09-2015                                                                       | 10-2015                                                           |
| Region of Southern Denmark | Fanø                | 09-2015                                                                       | 10-2015                                                           |
| Region of Southern Denmark | Fredericia          | 09-2015                                                                       | 10-2015                                                           |
| Region of Southern Denmark | Faaborg-Midtfyn     | 09-2015                                                                       | 10-2015                                                           |
| Region of Southern Denmark | Haderslev           | 09-2015                                                                       | 10-2015                                                           |
| Region of Southern Denmark | Kerteminde          | 09-2015                                                                       | 10-2015                                                           |

|                            |                   |         |         |
|----------------------------|-------------------|---------|---------|
| Region of Southern Denmark | Kolding           | 09-2015 | 10-2015 |
| Region of Southern Denmark | Langeland         | 09-2015 | 09-2015 |
| Region of Southern Denmark | Middelfart        | 09-2015 | 10-2015 |
| Region of Southern Denmark | Nordfyns          | 09-2015 | 10-2015 |
| Region of Southern Denmark | Nyborg            | 09-2015 | 09-2015 |
| Region of Southern Denmark | Odense            | 09-2015 | 10-2015 |
| Region of Southern Denmark | Svendborg         | 09-2015 | 09-2015 |
| Region of Southern Denmark | Sønderborg        | 09-2015 | 10-2015 |
| Region of Southern Denmark | Tønder            | 09-2015 | 10-2015 |
| Region of Southern Denmark | Varde             | 09-2015 | 10-2015 |
| Region of Southern Denmark | Vejen             | 09-2015 | 10-2015 |
| Region of Southern Denmark | Vejle             | 09-2015 | 10-2015 |
| Region of Southern Denmark | Ærø               | 09-2015 | 09-2015 |
| Region of Southern Denmark | Aabenraa          | 09-2015 | 10-2015 |
| Region Zealand             | Overall           | 02-2014 | 02-2014 |
| Region Zealand             | Faxe              | 02-2014 | 02-2014 |
| Region Zealand             | Greve             | 02-2014 | 02-2014 |
| Region Zealand             | Guldborgsund      | 02-2014 | 02-2014 |
| Region Zealand             | Holbæk            | 02-2014 | 02-2014 |
| Region Zealand             | Kalundborg        | 02-2014 | 02-2014 |
| Region Zealand             | Køge              | 02-2014 | 02-2014 |
| Region Zealand             | Lejre             | 02-2014 | 02-2014 |
| Region Zealand             | Lolland           | 02-2014 | 02-2014 |
| Region Zealand             | Næstved           | 02-2014 | 02-2014 |
| Region Zealand             | Odsherred         | 02-2014 | 02-2014 |
| Region Zealand             | Ringsted          | 02-2014 | 02-2014 |
| Region Zealand             | Roskilde          | 02-2014 | 02-2014 |
| Region Zealand             | Slagelse          | 02-2014 | 02-2014 |
| Region Zealand             | Solrød            | 02-2014 | 02-2014 |
| Region Zealand             | Sorø              | 02-2014 | 02-2014 |
| Region Zealand             | Stevns            | 02-2014 | 02-2014 |
| Region Zealand             | Vordingborg       | 02-2014 | 02-2014 |
| Central Denmark Region     | Overall           | 03-2011 | 04-2011 |
| Central Denmark Region     | Favrskov          | 09-2010 | 10-2010 |
| Central Denmark Region     | Hedensted         | 10-2010 | 10-2010 |
| Central Denmark Region     | Herning           | 01-2008 | 01-2008 |
| Central Denmark Region     | Holstebro         | 01-2008 | 01-2008 |
| Central Denmark Region     | Horsens           | 09-2010 | 10-2010 |
| Central Denmark Region     | Ikast-Brande      | 01-2008 | 01-2008 |
| Central Denmark Region     | Lemvig            | 01-2008 | 01-2008 |
| Central Denmark Region     | Norddjurs         | 09-2010 | 10-2010 |
| Central Denmark Region     | Odder             | 09-2010 | 10-2010 |
| Central Denmark Region     | Randers           | 09-2010 | 10-2010 |
| Central Denmark Region     | Ringkøbing-Skjern | 01-2008 | 01-2008 |
| Central Denmark Region     | Samsø             | 09-2010 | 10-2010 |
| Central Denmark Region     | Silkeborg         | 09-2010 | 10-2010 |

|                        |                              |         |         |
|------------------------|------------------------------|---------|---------|
| Central Denmark Region | Skanderborg                  | 09-2010 | 10-2010 |
| Central Denmark Region | Skive                        | 03-2011 | 04-2011 |
| Central Denmark Region | Struer                       | 01-2008 | 01-2008 |
| Central Denmark Region | Syddjurs                     | 09-2010 | 10-2010 |
| Central Denmark Region | Viborg                       | 03-2011 | 04-2011 |
| Central Denmark Region | Århus                        | 09-2010 | 10-2010 |
| North Denmark Region   | Overall                      | 12-2013 | 01-2014 |
| North Denmark Region   | Aalborg                      | 12-2013 | 01-2014 |
| North Denmark Region   | Brønderslev-<br>Dronninglund | 12-2013 | 01-2014 |
| North Denmark Region   | Frederikshavn                | 12-2013 | 01-2014 |
| North Denmark Region   | Hjørring                     | 12-2013 | 01-2014 |
| North Denmark Region   | Jammerbugt                   | 12-2013 | 01-2014 |
| North Denmark Region   | Læsø                         | 12-2013 | 01-2014 |
| North Denmark Region   | Mariagerfjord                | 12-2013 | 01-2014 |
| North Denmark Region   | Morsø                        | 12-2013 | 01-2014 |
| North Denmark Region   | Rebild                       | 12-2013 | 01-2014 |
| North Denmark Region   | Thisted                      | 12-2013 | 01-2014 |
| North Denmark Region   | Vesthimmerlands              | 12-2013 | 01-2014 |

20 **Table S3. Annual proportions of individuals with a recorded creatinine test**

|      | North Denmark Region | Central Denmark Region | Capital Region of Denmark | Region of Southern Denmark | Region Zealand | Denmark |
|------|----------------------|------------------------|---------------------------|----------------------------|----------------|---------|
| 2008 | 34.0%                | 26.4%                  | 2.4%                      | 0.3%                       | 0.2%           | 10.4%   |
| 2009 | 34.6%                | 29.2%                  | 10.3%                     | 0.6%                       | 1.2%           | 13.6%   |
| 2010 | 31.9%                | 31.6%                  | 22.7%                     | 0.6%                       | 1.9%           | 17.8%   |
| 2011 | 35.9%                | 32.5%                  | 26.1%                     | 0.6%                       | 2.3%           | 19.6%   |
| 2012 | 36.8%                | 33.6%                  | 28.4%                     | 0.7%                       | 2.7%           | 20.7%   |
| 2013 | 37.5%                | 34.5%                  | 26.3%                     | 0.7%                       | 2.3%           | 20.3%   |
| 2014 | 38.7%                | 35.9%                  | 31.2%                     | 8.1%                       | 36.0%          | 28.8%   |
| 2015 | 39.4%                | 36.5%                  | 33.5%                     | 22.3%                      | 39.6%          | 33.3%   |
| 2016 | 40.4%                | 37.0%                  | 33.7%                     | 40.9%                      | 40.3%          | 37.6%   |
| 2017 | 40.9%                | 37.3%                  | 34.2%                     | 41.3%                      | 40.5%          | 38.0%   |
| 2018 | 41.6%                | 37.9%                  | 35.1%                     | 41.8%                      | 40.9%          | 38.6%   |

21 **Note:**

22 The color of the field illustrates if the geographical coverage was considered complete (green)

23 or incomplete (orange) in the given year.



24 **Figure**

25 **Figure S1. Typical pattern of reporting (municipality of Vejle in 2015).**

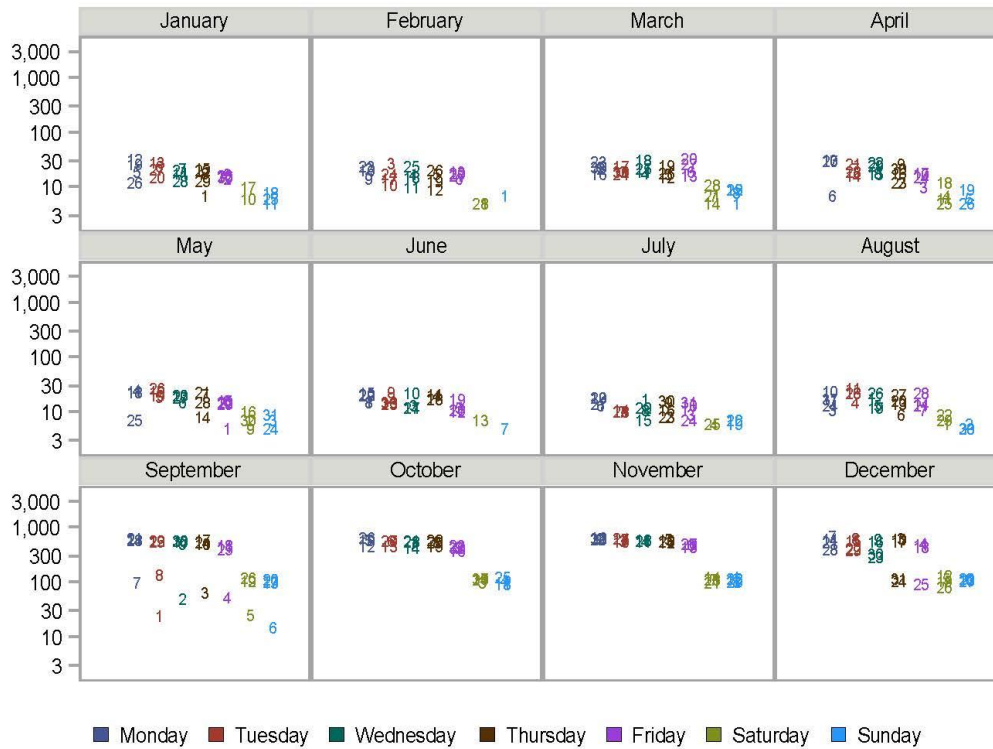

26

27 **Note:**

28 The numbers in the panels indicate the date of each month and the color of the number  
29 indicates the day of the week. The position on the y-axis indicates the number of tests  
30 performed on a given date. Here we considered November to be the first month with complete  
31 reporting throughout. Note that due to the Christmas holidays there is an expected drop in  
32 testing in late December.
